# Supplementary material for: Ir56d-dependent fatty acid responses in Drosophila uncover taste discrimination between different classes of fatty acids
Source: eLife. 2021 May 5;10:e67878. doi: 10.7554/eLife.67878 (PMC8169106; doi:10.7554/eLife.67878)
Supplement: Figure 1—source data 1. [file elife-67878-fig1-data1.xlsx]

## Sheet: Fig 1B
Naïve							Trained – 6C
Pre-Test - 6C	Training - 1	Training - 2	Training - 3	Test-6C	Test-5C		Pre-Test - 6C	Training - 1	Training - 2	Training - 3	Test-6C	Test-5C
66	100	66	0	33	0		100	66	33	0	66	66
100	100	100	100	66	100		66	66	0	0	33	100
100	100	100	100	100	100		100	33	33	0	0	33
100	66	100	33	0	33		100	33	100	0	66	0
66	33	33	33	33	66		100	66	33	0	33	66
100	66	66	100	100	100		66	100	0	0	0	100
100	66	100	100	66	33		100	0	33	0	0	0
66	100	66	100	66	0		100	33	0	0	0	33
0	33	0	33	0	0		100	66	66	0	33	100
66	66	33	66	100	66		33	66	33	33	0	100
100	66	100	66	66	33		0	0	0	0	0	100
100	100	100	100	100	66		66	33	66	0	0	66
100	100	100	100	100	33		100	33	66	0	33	100
66	66	100	33	100	100		100	100	100	100	66	66
33	0	33	33	100	100		100	33	0	0	0	33
100	100	100	66	100	100		66	0	33	0	0	33
0	66	0	33	0	0		100	66	100	33	0	66
100	100	33	33	66	0		66	66	33	0	0	66
100	100	66	100	66	66		66	66	0	0	0	66
100	100	100	100	66	100		33	33	0	33	33	100
0	100	33	33	0	66		100	33	33	33	0	66
100	100	100	33	33	33		100	33	33	66	0	100
100	100	100	100	66	33		100	100	100	33	0	100
100	100	100	100	100	66		33	0	0	0	33	0
33	66	0	33	0	0		100	33	33	33	0	100
33	100	33	100	66	33		100	33	0	0	33	33
66	0	33	33	0	0		100	66	33	0	66	100
100	100	100	33	33	100		0	33	0	0	33	100
33	33	0	0	100	100		66	0	0	0	0	66
100	100	66	100	100	100		66	66	0	0	0	33
100	66	100	66	100	100		100	33	0	33	0	33
100	66	66	66	66	66		100	33	0	0	100	0
100	100	66	33	0	66		100	33	33	0	0	0
100	66	66	66	66	0		100	33	33	33	66	100
100	33	33	33	0	0		100	33	0	0	0	66
100	100	66	33	66	66		100	0	0	0	33	33
66	100	100	100	66	66		100	33	100	33	0	33
100	66	100	66	100	66		66	33	66	33	0	33
100	66	66	66	100	33		100	33	0	0	33	33
66	33	66	33	33	33		100	66	0	0	0	33
66	100	0	66	0	0
66	33	33	66	66	100

## Sheet: Fig 1C
Naïve							Trained – 6C
Pre-Test - 6C	Training - 1	Training - 2	Training - 3	Test-6C	Test-9C		Pre-Test - 6C	Training - 1	Training - 2	Training - 3	Test-6C	Test-9C
33	100	0	33	33	33		66	0	33	0	33	66
100	100	66	66	33	33		66	66	0	0	33	100
33	33	66	66	100	66		100	33	0	0	0	66
100	66	100	33	66	33		100	0	0	0	0	33
66	100	100	100	100	66		100	33	0	0	0	66
100	66	33	66	0	66		100	33	0	0	0	0
100	66	100	66	33	33		100	33	0	33	66	100
33	66	33	33	66	33		33	33	0	0	0	0
100	33	0	66	0	66		66	33	33	0	0	100
100	100	66	66	66	33		33	33	33	0	0	33
100	100	0	66	66	0		0	0	33	0	0	0
66	0	0	0	0	66		66	66	0	0	33	66
0	0	66	33	33	0		100	66	0	0	0	0
66	100	66	100	66	66		66	33	0	0	0	100
66	33	66	100	66	0		66	0	0	0	33	100
100	66	66	66	66	66		0	0	66	0	0	100
0	66	100	100	100	100		66	0	0	0	0	0
33	33	33	33	0	0		33	33	0	0	0	100
100	100	33	66	100	0		33	33	0	0	0	0
100	100	100	100	66	100		66	33	66	0	66	33
100	66	66	33	33	66		100	0	0	0	0	66
100	100	33	100	66	33		0	66	33	33	0	33
0	66	33	100	0	33		100	66	0	0	33	66
66	33	0	0	0	33		0	0	0	0	0	66
100	66	100	100	100	0		100	66	66	0	0	100
0	33	33	33	33	0		0	0	0	0	33	0
66	66	33	33	0	66		66	0	0	0	0	0
66	66	33	66	33	33		0	0	33	0	33	100
0	0	0	0	0	0		100	100	33	0	33	0
66	100	66	0	66	66		66	0	0	0	0	0
66	66	100	100	66	33		66	0	0	0	0	33
100	66	100	100	100	0		0	0	33	0	0	0
100	33	100	66	100	100		66	66	0	0	0	33
66	0	33	0	33	66
66	66	0	0	33	100
100	33	0	0	0	66
100	0	0	0	0	33
100	33	0	0	0	66
100	33	0	0	0	0
100	33	0	33	66	100
33	33	0	0	0	0
66	33	33	0	0	100
33	33	33	0	0	33
0	0	33	0	0	0
66	66	0	0	33	66
100	66	0	0	0	0
66	33	0	0	0	100
66	0	0	0	33	100
0	0	66	0	0	100
66	0	0	0	0	0
33	33	0	0	0	100
33	33	0	0	0	0
66	33	66	0	66	33
100	0	0	0	0	66
0	66	33	33	0	33
100	66	0	0	33	66
0	0	0	0	0	66
100	66	66	0	0	100
0	0	0	0	33	0
66	0	0	0	0	0
0	0	33	0	33	100
100	100	33	0	33	0
66	0	0	0	0	0
66	0	0	0	0	33
0	0	33	0	0	0
66	66	0	0	0	33
				33
				33
				100
				66
				100
				0
				33
				66
				0
				66
				66
				0
				33
				66
				66
				66
				100
				0
				100
				66
				33
				66
				0
				0
				100
				33
				0
				33
				0
				66
				66
				100
				100
					33
					33
					66
					33
					66
					66
					33
					33
					66
					33
					0
					66
					0
					66
					0
					66
					100
					0
					0
					100
					66
					33
					33
					33
					0
					0
					66
					33
					0
					66
					33
					0
					100
				33
				33
				0
				0
				0
				0
				66
				0
				0
				0
				0
				33
				0
				0
				33
				0
				0
				0
				0
				66
				0
				0
				33
				0
				0
				33
				0
				33
				33
				0
				0
				0
				0
					66
					100
					66
					33
					66
					0
					100
					0
					100
					33
					0
					66
					0
					100
					100
					100
					0
					100
					0
					33
					66
					33
					66
					66
					100
					0
					0
					100
					0
					0
					33
					0
					33

## Sheet: Fig 1D
Naïve							Trained – 5C
Pre-Test - 5C	Training - 1	Training - 2	Training - 3	Test-5C	Test-9C		Pre-Test - 5C	Training - 1	Training - 2	Training - 3	Test-5C	Test-9C
0	66	0	33	66	0		66	0	0	0	0	0
100	66	100	66	33	33		33	0	0	0	0	33
33	0	0	0	0	33		66	33	0	33	0	33
0	0	0	0	33	0		66	33	0	0	33	33
66	0	0	0	0	0		66	33	0	0	0	33
66	33	33	66	100	100		66	0	0	0	0	33
100	100	100	100	66	0		100	66	0	0	0	33
33	66	0	33	0	33		66	33	0	0	33	66
100	66	66	66	0	33		100	0	0	0	0	0
100	100	100	33	66	33		33	0	66	0	0	33
0	33	100	100	100	33		33	0	0	0	0	0
33	33	33	100	33	33		0	0	0	33	33	66
33	66	0	33	0	33		0	0	0	0	0	33
0	33	33	33	33	0		100	66	0	0	33	33
33	100	100	33	33	66		66	0	0	0	0	33
33	0	0	0	66	33		0	66	33	0	33	33
66	100	0	33	33	0		33	0	66	0	33	33
0	66	100	33	66	0		66	66	0	0	0	100
100	33	33	100	100	33		100	66	0	0	33	100
100	66	66	33	33	0		33	33	33	0	0	66
33	66	100	100	100	33		0	66	66	33	33	33
0	33	0	0	0	33		0	0	0	0	0	0
66	0	33	0	0	100		33	0	0	0	0	33
33	0	33	0	0	0		100	0	33	0	0	0
66	100	66	66	66	33		100	66	33	66	66	100
66	66	66	33	66	33		33	0	33	0	0	0
0	0	0	0	33	0		66	66	0	0	0	33
66	0	66	0	66	33		100	33	33	0	0	33

## Sheet: Fig 1E
Naïve							Trained – 4C
Pre-Test - 4C	Training - 1	Training - 2	Training - 3	Test-4C	Test-5C		Pre-Test - 4C	Training - 1	Training - 2	Training - 3	Test-4C	Test-5C
100	100	100	33.3333	100	0		33.3333	66.6667	33.3333	33.3333	0	0
100	100	100	33.3333	100	0		0	66.6667	0	0	0	0
33.3333	0	33.3333	0	0	66.6667		33.3333	33.3333	33.3333	0	0	0
33.3333	33.3333	66.6667	0	0	0		33.3333	100	0	0	0	0
66.6667	66.6667	66.6667	66.6667	66.6667	100		33.3333	0	0	0	0	33.3333
33.3333	33.3333	100	100	100	100		66.6667	0	0	0	0	0
66.6667	33.3333	0	0	33.3333	0		66.6667	33.3333	33.3333	33.3333	0	33.3333
33.3333	0	33.3333	66.6667	66.6667	33.3333		0	0	0	0	0	0
66.6667	0	0	0	0	33.3333		33.3333	0	33.3333	0	0	0
33.3333	66.6667	66.6667	66.6667	66.6667	66.6667		0	0	0	0	0	33.3333
0	0	0	33.3333	0	0		0	66.6667	33.3333	33.3333	33.3333	0
66.6667	100	66.6667	66.6667	66.6667	100		100	0	0	0	0	0
100	100	100	100	100	100		33.3333	33.3333	0	0	0	0
0	0	0	33.3333	0	66.6667		66.6667	66.6667	33.3333	0	0	33.3333
33.3333	33.3333	100	66.6667	66.6667	33.3333		66.6667	66.6667	0	0	0	0
66.6667	66.6667	100	100	66.6667	33.3333		66.6667	33.3333	33.3333	0	0	33.3333
66.6667	66.6667	0	66.6667	33.3333	66.6667		0	33.3333	0	0	33.3333	0
0	0	0	0	0	100		33.3333	0	0	0	0	0
66.6667	66.6667	0	33.3333	33.3333	66.6667		100	100	66.6667	0	0	0
0	0	0	0	0	0		100	100	33.3333	0	0	0

## Sheet: Fig 1F
Naïve							Trained – 6C
Pre-Test - 6C	Training - 1	Training - 2	Training - 3	Test-6C	Test-7C		Pre-Test - 6C	Training - 1	Training - 2	Training - 3	Test-6C	Test-7C
100	66	0	33	0	33		100	66	66	33	100	0
66	66	33	100	100	0		0	0	0	33	100	66
33	66	33	0	33	66		66	66	0	0	0	66
0	66	66	100	100	66		66	100	33	33	33	0
33	66	100	66	66	33		100	66	33	0	0	0
66	100	100	66	100	100		33	66	33	0	0	0
100	100	66	100	33	66		100	33	66	33	0	33
100	100	100	100	100	100		100	100	66	33	66	0
100	100	100	100	100	66		100	66	66	0	0	0
100	66	0	33	33	33		100	33	0	0	0	0
66	66	100	66	100	66		100	100	66	33	0	66
33	33	33	33	100	0		100	100	33	66	66	66
66	100	100	66	100	100		100	100	33	66	33	66
100	66	100	100	33	66		66	0	0	0	0	0
66	0	0	33	66	100		100	33	0	0	0	0
100	100	66	0	0	0		100	66	33	0	0	0
100	100	100	100	66	0		33	0	0	0	66	0
33	66	100	100	100	100		33	0	0	0	33	100
100	100	66	66	66	100		33	33	0	0	0	66
66	100	33	0	100	0		66	0	33	0	0	33
66	100	100	66	66	66		100	33	0	0	33	33
100	66	100	66	100	66		100	100	66	0	0	33
66	100	33	100	100	33		100	66	66	0	33	0
100	66	0	100	0	100		100	0	0	0	33	0
100	100	100	100	100	100		33	33	33	33	33	66
100	100	100	100	100	66		100	66	0	0	0	33
66	33	100	100	100	100		66	33	0	0	0	0
66	100	100	100	100	100		100	66	0	0	66	100
66	33	0	0	33	0		66	66	0	0	0	66
66	100	100	33	100	66		66	33	0	33	33	0
33	33	0	0	0	0		66	66	66	0	66	0
66	100	100	100	33	0		100	100	33	0	0	0
100	100	66	100	66	33		100	100	33	66	33	0
33	33	0	33	66	66		100	66	66	33	33	66
100	100	100	100	100	100		100	33	33	0	0	33
33	33	33	100	100	33		100	66	33	0	33	0
100	100	100	100	66	100		66	66	0	0	0	33
100	100	100	100	100	100		66	100	0	33	33	66
100	100	66	33	66	66		33	33	0	0	0	0
66	66	66	66	66	66		66	33	33	0	0	0
							66	0	0	0	0	0
							33	0	0	0	0	0

## Sheet: Fig 1G
Naïve							Trained – 6C
Pre-Test - 6C	Training - 1	Training - 2	Training - 3	Test-6C	Test-8C		Pre-Test - 6C	Training - 1	Training - 2	Training - 3	Test-6C	Test-8C
66	100	33	100	33	66		66	100	66	0	33	33
33	33	0	0	33	0		66	0	0	33	0	33
33	66	33	0	66	66		0	0	0	0	0	0
100	66	100	100	66	66		100	66	0	0	0	0
33	0	66	100	66	0		0	66	33	0	0	33
100	100	100	100	66	100		33	0	33	0	0	0
100	100	100	100	100	100		33	33	0	0	0	66
33	0	0	0	0	33		66	33	0	0	0	0
100	100	100	100	100	0		0	66	0	0	0	0
100	100	33	100	33	66		100	0	0	0	33	0
66	0	33	100	66	100		100	66	33	0	100	66
0	66	66	66	100	33		33	66	66	33	100	0
66	66	66	33	33	0		100	33	33	33	33	0
33	33	0	0	0	0		0	33	0	33	33	33
100	100	100	100	66	100		0	0	0	0	0	0
0	0	0	66	0	33		100	33	66	0	0	66
0	0	0	0	66	100		100	33	0	0	33	0
100	33	66	66	66	0		100	66	0	0	0	0
33	66	0	0	33	0		66	33	0	0	0	0
66	66	100	100	0	100		66	66	0	0	0	33
66	100	66	66	33	33		33	33	0	0	0	33
0	0	33	66	66	66		0	0	0	33	0	0
100	66	100	100	66	100		66	33	0	33	0	0
100	33	33	33	33	33		66	100	100	66	33	33
66	100	66	66	100	66		100	33	33	0	33	66
0	33	66	66	100	66		100	100	33	0	0	66
33	33	66	0	33	33		66	66	33	0	0	0
100	100	100	66	100	66		33	0	0	0	0	0
100	100	66	66	33	66		0	0	0	0	0	0
100	66	66	33	66	66		33	33	0	0	0	0
100	66	100	66	100	66		100	100	33	33	66	66
66	100	100	100	66	66		33	33	0	0	0	0
100	100	100	100	100	100		100	33	0	0	33	0
							100	33	33	66	66	100

## Sheet: Fig 1H
Naïve							Trained – 7C
Pre-Test - 7C	Training - 1	Training - 2	Training - 3	Test-7C	Test-8C		Pre-Test - 7C	Training - 1	Training - 2	Training - 3	Test-7C	Test-8C
100	66	33	33	0	100		33	33	0	0	0	33
66	33	0	0	0	33		33	0	0	0	0	0
66	66	33	33	0	33		33	33	0	0	0	0
33	66	100	100	100	100		100	33	0	0	0	0
33	66	33	66	66	33		100	66	0	0	33	0
33	33	66	66	66	0		0	0	0	0	0	0
0	33	66	0	33	0		0	0	33	0	33	0
33	66	33	66	66	33		33	33	0	0	33	33
100	33	66	33	100	0		0	33	0	0	0	0
100	100	100	66	66	100		66	33	0	0	0	33
33	33	66	66	33	100		100	33	0	0	0	0
66	33	33	0	33	0		100	33	0	0	33	0
33	66	66	100	33	33		66	100	0	0	0	33
33	66	66	33	33	0		100	66	0	0	0	66
33	0	33	0	33	0		100	0	0	0	0	33
0	100	100	66	66	33		33	100	0	0	0	0
100	33	66	66	66	100		33	33	0	0	0	66
66	100	33	66	33	0		100	33	0	0	0	33
66	66	100	66	100	66		33	33	33	0	0	0
0	33	0	0	33	33		66	33	33	0	33	66
100	100	100	33	33	66		66	0	0	0	66	33
66	33	0	66	33	100		0	0	0	0	33	0
100	33	0	0	0	33		33	33	0	33	33	33
66	0	66	100	66	100		100	33	0	33	66	0
0	0	0	0	0	0		33	0	0	0	0	0
66	33	66	0	100	66		0	66	66	0	33	66
66	0	66	33	0	66		66	33	0	33	33	66
33	66	100	66	0	0		100	0	0	0	33	0
100	100	66	100	66	66		33	0	0	0	0	0
66	66	66	100	66	33		100	0	33	0	0	0
0	33	33	33	66	33		100	33	0	0	0	0
33	0	0	33	66	0		0	0	0	0	0	0
100	33	0	33	100	100		33	66	0	0	0	33
0	100	100	100	33	100		33	0	66	0	0	0
33	33	66	33	33	33		0	0	0	0	0	33
33	33	33	33	33	33		33	33	0	0	0	0
100	66	33	66	33	66		66	0	0	33	0	0

## Sheet: Fig 1I
Naïve							Trained – 10C
Pre-Test - 10C	Training - 1	Training - 2	Training - 3	Test-10C	Test-9C		Pre-Test - 10C	Training - 1	Training - 2	Training - 3	Test-10C	Test-9C
0	0	0	33.3333	0	0		33.3333	0	0	0	0	0
66.6667	100	66.6667	100	100	33.3333		0	0	0	0	0	33.3333
0	33.3333	66.6667	100	100	66.6667		100	100	66.6667	33.3333	0	66.6667
66.6667	0	33.3333	66.6667	33.3333	33.3333		66.6667	66.6667	0	0	0	0
66.6667	66.6667	0	33.3333	0	66.6667		100	33.3333	0	0	0	0
33.3333	0	33.3333	0	33.3333	100		100	0	0	0	0	0
33.3333	33.3333	66.6667	66.6667	100	0		0	0	0	0	0	0
66.6667	0	0	0	0	33.3333		66.6667	33.3333	66.6667	0	33.3333	0
33.3333	100	100	100	100	33.3333		0	33.3333	0	0	0	33.3333
33.3333	100	33.3333	66.6667	0	66.6667		0	0	0	0	0	0
66.6667	33.3333	33.3333	0	33.3333	0		33.3333	33.3333	0	0	0	0
0	0	0	0	0	33.3333		0	0	66.6667	0	0	0
66.6667	66.6667	0	66.6667	100	66.6667		66.6667	66.6667	0	0	0	0
100	100	100	100	66.6667	66.6667		100	66.6667	33.3333	0	0	0
66.6667	0	33.3333	33.3333	100	100		33.3333	0	0	0	0	33.3333
100	100	100	66.6667	100	33.3333		33.3333	0	33.3333	33.3333	0	33.3333
0	33.3333	66.6667	100	0	33.3333		33.3333	33.3333	0	0	0	0
66.6667	100	100	66.6667	66.6667	100		0	0	0	0	0	33.3333
33.3333	0	33.3333	0	0	33.3333		100	66.6667	0	0	0	0
100	100	100	100	100	0		100	66.6667	0	0	33.3333	0

## Sheet: Fig 1 - S1A
Naïve							Trained – 5C
Pre-Test - 5C	Training - 1	Training - 2	Training - 3	Test-5C	Test-6C		Pre-Test - 5C	Training - 1	Training - 2	Training - 3	Test-5C	Test-6C
33	100	100	33	33	33		33	33	0	0	0	33
100	100	100	100	66	66		66	0	0	0	0	66
100	100	100	66	100	100		100	33	33	33	33	66
66	0	0	0	0	33		100	66	33	0	0	0
100	0	33	66	33	33		100	100	33	0	0	100
100	66	66	100	100	66		66	33	0	33	33	66
66	33	0	33	0	66		33	0	0	0	33	0
100	100	100	100	100	66		66	33	0	0	0	33
66	100	100	100	100	66		33	0	0	0	0	33
66	33	66	33	66	66		100	0	0	0	0	66
100	33	33	0	33	0		100	66	0	0	66	33
100	33	66	0	33	0		100	33	0	0	0	0
66	100	0	0	66	66		100	0	0	0	0	0
66	100	66	100	100	66		66	33	0	0	0	66
66	33	33	0	0	33		66	33	0	0	66	33
0	0	33	0	0	0		100	66	0	0	0	33
100	33	66	66	33	66		100	100	0	33	0	100
100	100	100	66	100	100		100	33	0	33	0	66
100	100	33	66	100	66		66	33	0	0	66	66
33	100	33	33	66	100		100	33	0	0	0	0
66	100	100	100	100	100		100	66	33	0	0	33
66	66	100	0	33	66		66	33	33	0	0	66
100	66	100	100	100	100		100	33	0	0	0	66
100	100	100	100	66	66		0	0	0	0	33	66
100	66	0	33	66	33		0	33	0	0	0	66
66	66	0	100	33	100		33	0	0	0	0	33
33	0	33	0	0	0		100	66	0	0	66	33
100	0	100	0	0	66		100	33	0	0	66	33
66	100	100	33	100	100		66	33	0	0	0	66
66	33	66	66	33	66		33	33	0	0	0	100
33	100	33	0	66	33		33	0	0	0	0	66
66	66	66	66	66	33		100	33	0	0	33	100
100	100	33	66	66	100		100	33	0	33	0	66
0	0	33	33	33	100		100	33	0	33	0	33
66	33	66	100	66	100		66	66	0	0	33	33
0	66	0	33	0	0

## Sheet: Fig 1 - S1B
Naïve							Trained – 9C
Pre-Test - 9C	Training - 1	Training - 2	Training - 3	Test-9C	Test-6C		Pre-Test - 9C	Training - 1	Training - 2	Training - 3	Test-9C	Test-6C
33	100	0	33	100	66		0	0	33	0	33	100
0	0	0	0	100	33		33	0	0	0	0	100
0	66	100	66	33	33		0	33	33	33	33	33
33	33	0	0	0	100		0	0	0	0	0	33
0	0	0	0	0	66		33	0	33	0	0	66
33	66	0	0	0	66		0	0	0	0	0	33
100	100	0	0	33	100		33	0	0	0	0	0
0	0	33	66	33	66		33	33	0	33	0	33
0	0	33	66	0	100		33	33	0	33	33	66
100	100	100	33	66	100		0	0	0	0	0	100
0	66	33	33	66	100		0	0	0	0	33	33
33	0	0	33	0	66		0	33	0	0	33	100
0	66	0	0	33	33		100	0	0	0	0	100
33	100	100	66	66	0		100	66	66	0	0	66
33	0	0	33	33			0	0	0	0	0	100
33	66	66	0	0			33	0	0	0	0	0
0	0	0	33	66			33	33	0	0	0	100
66	66	66	33	100			66	0	0	33	0	33
0	100	33	66	0			66	33	33	0	33	66
33	66	66	100	100			33	0	0	0	0	66
0	0	33	0	0			0	0	0	0	0	0
0	0	0	0	0			66	0	0	0	66	33
100	33	66	0	0			33	66	0	0	33	33
100	33	0	100	0			33	33	0	33	0	100
0	0	0	0	100			33	33	0	0	33	33
0	0	0	0	100			0	0	0	0	0	66
0	0	0	0	0			0	0	0	0	0	100
0	33	0	100	33			33	0	0	0	66	66
0	0	33	0	0			33	0	0	33	0	66
66	0	66	0	33			0	33	33	0	66	66
0	33	66	66	0			33	0	66	33	33	100
0	0	0	66	66			33	0	0	0	33	33
0	33	33	0	0			33	0	0	0	0	100
66	33	100	100	66			0	0	33	33	0	66
66	100	66	0	66			0	0	0	33	33	100
0	0	0	0	33			33	0	0	0	0	100
100	66	33	33	100			0	0	0	0	0	66
							66	0	0	0	0	100

[truncated: 11 more sheets: Fig 1 - S1C, Fig 1 - S1D, Fig 1 - S1E, Fig 1 - S1F, Fig 1 - S2A, Fig S2B, Fig 1 - S2C, Fig 1 - S3A, Fig 1 - S3B, Fig 1 - S3C, Fig 1 - S3D]
