# Supplementary material for: Ir56d-dependent fatty acid responses in Drosophila uncover taste discrimination between different classes of fatty acids
Source: eLife. 2021 May 5;10:e67878. doi: 10.7554/eLife.67878 (PMC8169106; doi:10.7554/eLife.67878)
Supplement: Figure 2—source data 1. [file elife-67878-fig2-data1.xlsx]

## Sheet: Fig 2B
Control					No Antenna					No Palp					No Antenna or Palp
6C		Sucrose			6C		Sucrose			6C		Sucrose			6C		Sucrose
Naïve	Trained – 6C	Naïve	Trained – 6C		Naïve	Trained – 6C	Naïve	Trained – 6C		Naïve	Trained – 6C	Naïve	Trained – 6C		Naïve	Trained – 6C	Naïve	Trained – 6C
0	33	0	33		33	0	100	100		0	0	0	0		0	0	100	0
100	100	100	100		0	33	100	33		100	0	66	66		33	66	33	100
100	0	66	100		33	0	0	100		100	0	66	100		0	0	100	33
100	0	100	100		33	33	33	100		100	0	66	66		100	0	100	33
100	33	100	0		66	66	66	100		66	33	100	33		33	0	100	100
100	0	100	33		33	0	100	33		0	33	0	100		0	0	66	100
33	0	0	66		66	33	0	33		100	0	100	33		100	0	100	0
33	0	0	33		66	0	100	100		0	33	0	100		66	0	100	100
100	0	100	100		100	33	100	33		0	0	33	100		0	66	33	66
100	66	33	66		66	33	100	33		100	66	100	33		33	66	66	100
66	0	100	100		66	0	66	33		33	33	33	0		100	0	0	66
66	0	100	100		100	0	66	0		66	0	100	100		66	0	66	100
33	0	100	0		66	33	66	33		100	33	66	100		66	33	100	66
	33		0		100	66	100	100		66	0	0	100		100	0	0	66
					0	33	33	0		66	0	100	66		100	0	33	33
					100	0	33	66		33	66	100	100		33	0	100	100
					100	33	66	100		100		100			0	0	33	0
					100	33	100	0		100		100			33	0	66	0
					100	33	100	66		0		33			0	0	0	66
					0	0	100	66		66		0			0	0	66	66
					100	0	100	0		0		33			66	66	33	66
					33	0	33	0							100	33	100	0
					100	100	100	100							66	33	66	0
					66	0	66	0								0		100
					66	0	66	100								0		33
					0		0									0		100

## Sheet: Fig 2C
Control					No Antenna					No Palp					No Antenna or Palp
6C		5C			6C		5C			6C		5C			6C		5C
Naïve	Trained – 6C	Naïve	Trained – 6C		Naïve	Trained – 6C	Naïve	Trained – 6C		Naïve	Trained – 6C	Naïve	Trained – 6C		Naïve	Trained – 6C	Naïve	Trained – 6C
0	0	66	100		0	0	33	66		0	0	0	100		66	0	100	100
33	0	100	33		100	0	0	33		66	100	33	66		0	66	0	0
100	0	66	100		66	33	100	33		33	0	66	33		66	0	100	66
100	33	100	0		0	0	100	100		100	0	100	100		100	0	66	66
0	0	0	0		66	0	100	100		100	0	66	0		66	0	33	0
66	33	100	100		66	0	100	0		66	0	100	33		0	0	33	0
33	0	33	33		100	33	0	100		33	0	66	66		0	0	33	0
66	33	33	100		0	66	0	100		33	0	66	100		0	0	33	33
33	0	66	0		0	0	66	33		100	0	66	33		66	0	0	33
66	0	0	0		0	0	0	33		66	33	66	100		66	66	33	100
33	33	100	100		33	33	66	100		0	0	66	0		33	33	66	66
33	33	33	33		100	0	33	0		66	33	100	66		66	0	66	66
100	0	100	100		33	0	66	33		0	0	0	33		0	0	0	33
0	0	66	66		0	0	0	0		66	33	0	33		33	33	33	66
100	0	33	33		0	0	100	66		100	0	0	0		66	0	66	33
33	0	33	33		33	33	66	66		0	0	0	33		66	0	100	33
33	33	100	100		100	33	100	66		33	0	33	66		66	0	100	0
100	33	33	0		66	0	66	66		33	33	0	100		66	0	33	0
0	33	33	66		33	0	66	66		33	33	33	33		33	0	0	100
66	33	100	66		66	0	55	33		33	0	33	33		66		100
33	0	100	100		33	0	0	66		33	0	33	66		0		100
0	33	0	33		33	0	33	66		66	100	66	100
66	0	100	33		33	0	0	66		0	33	33	66
100	0	66	66		33	0	66	66		33	0	66	100
100	0	100	66		100	0	33	33		33	33	33	0
100	100	66	100		100		66			0	0	66	0
										66	0	66	0
										66	33	100	66
										66	33	0	100
										66		66
										33		33

## Sheet: Fig 2D
Control					No Antenna					No Palp					No Antenna or Palp
6C		9C			6C		9C			6C		9C			6C		9C
Naïve	Trained – 6C	Naïve	Trained – 6C		Naïve	Trained – 6C	Naïve	Trained – 6C		Naïve	Trained – 6C	Naïve	Trained – 6C		Naïve	Trained – 6C	Naïve	Trained – 6C
0	66	0	33		66	0	0	66		0	0	0	100		33	0	0	0
100	66	100	33		0	33	33	100		33	0	0	0		100	33	33	0
66	0	33	33		66	33	33	0		66	66	33	33		0	0	0	66
33	0	33	66		0	33	0	33		66	0	33	100		0	0	100	0
100	0	0	100		33	33	0	100		100	33	100	0		66	0	66	0
66	0	66	0		66	0	100	0		66	0	100	0		33	0	0	33
100	33	33	66		0	0	100	0		0	0	66	100		33	0	33	0
66		100	66		66	33	33	33		33	0	66	66		66	66	0	66
100	0	66	0		100	0	66	100		66	66	66	66		33	0	100	100
33	33	100	0		100	0	100	66		66	0	0	100		66	0	100	100
100	66	33	66		33	100	0	100		100	33	33	33		0	33	0	0
0	0	66	0		100	33	100	33		33	0	100	0		100	0	33	0
33	0	100	100		100	0	66	33		100	0	33	0		66	0	33	33
33	0	0	33		66	0	0	66		100	33	33	66		100	0	33	100
100	0	100	0		33	0	0	33		66	0	33	66		100	0	33	66
0	0	0	100		33	33	66	100		0	0	0	33		0	0	100	100
0	0	66	100		66	0	66	66		100	66	0	66		0	0	100	0
100	33	100	100		66	0	100	100		33	33	0	100		100	100	33	100
66	33	100	0		0	0	33	66		33	0	33	0		100	33	100	100
0	33	0	66		66	66	33	33		66	0	33	0		100	0	33	66
100	33	33	66		33	0	33	33		0	33	0	66		66	0	0	0
66	33	0	100		100	33	66	66		33	0	100	66		33	33	33	66
66	0	100	33			0		0		0	33	33	0		33	33	0	66
100		33								100	0	100	66
33		33								66	0	100	0
										100		66
										33		0
