# Supplementary material for: Ir56d-dependent fatty acid responses in Drosophila uncover taste discrimination between different classes of fatty acids
Source: eLife. 2021 May 5;10:e67878. doi: 10.7554/eLife.67878 (PMC8169106; doi:10.7554/eLife.67878)
Supplement: Figure 3—source data 1. [file elife-67878-fig3-data1.xlsx]

## Sheet: Fig 3B
Control: IR56D-GAL4 > UAS-impTNT		Mutant: IR56D-GAL4 > UAS-TNT
66		0
100		100
0		0
0		66
100		66
0		0
100		66
66		100
0		100
100		33
0		100
0		0
100		33
100		100
33		100
100		0
0		0
0		100
100		33
100		66
33		100
0		66
0		33
100		0
33		100
33		66
66		66
100		0
100		33
66		33
100		100
0		0
0		66
66		100
33		66

## Sheet: Fig 3C
Control: IR56D-GAL4 > UAS-impTNT								Mutant: IR56D-GAL4 > UAS-TNT
4C	5C	6C	7C	8C	9C	10C		4C	5C	6C	7C	8C	9C	10C
66	66	66	66	0	66	100		66	33	0	66	100	0	33
33	33	66	100	0	33	100		0	0	0	0	66	66	0
66	33	0	66	0	100	0		100	66	0	0	0	66	33
33	100	100	66	66	66	0		33	0	0	0	0	66	0
66	66	66	100	66	100	0		33	66	0	33	33	100	33
66	0	0	100	66	66	33		33	0	33	0	0	66	66
66	66	100	100	33	66	100		0	100	0	33	0	33	33
0	100	33	33	100	66	66		100	33	66	0	0	0	33
100	0	100	0	66	100	100		33	66	0	0	0	33	33
100	33	66	0	33	33	0		33	0	0	66	0	66	100
33	33	100	0	66	33	33		33	100	33	0	0	0	33
66	66	100	66	66	0	66		33	66	0	33	0	100	100
0	66	33	66	33	33	33		66	66	0	33	0	33	66
66	100	66	100	66	66	33		66	66	0	33	0	100	0
0	66	66	100	66	0	33		100	0	0	0	0	66	33
33	100	33	0	100	33	0		100	100	0	0	33	0	33
0	100	66	33	0	0	33		0	100	66	0	0	0	0
66	0	33	33	100	100	66		100	100	0	33	33	66	100
100		66	100	33	100	66		0		66	33	66	33	100
100		33	100	100	100	0		33		0	100	0	100	0
66		100	66	0	66	0		100		100	0	33	33	0
66		33	33	100	33	100		100		0	33	0	33	66
100		33	100	33	0	0		66		0	0	66	0	33
100		33	33	0	33	100		66		0	0	33	33	33
		0	100	100	33	0				0	0	0	100	0
		0	0	33	66	33				0	66	0	100	0
		66	33	66	33	100				33	66	0	0	100
		100	100	0	100					66	33	0	33
		100		33	0					0		0	100
		66		100	33					0		0	0
		33		100	0					0		66	33
		100		0	0					0		33	100
		0			66					33			0
		66			66					0			33
		66			100					33			66
		66			0					33			66
		100								0
		0								66
		100								0
		33								66
		0								0
		0								0
		66								0
		100								66
		66								0

## Sheet: Fig 3D
Control: GR64f-GAL4 > UAS-impTNT		Mutant: GR64f-GAL4 > UAS-TNT
33.3333		0
66.6667		33.3333
33.3333		0
33.3333		0
100		0
33.3333		66.6667
0		0
100		0
100		66.6667
0		0
100		66.6667
33.3333		33.3333
0		0
33.3333		0
66.6667		0
100		0
100		0
33.3333		0
66.6667		33.3333
100		0
0		0
0		0
33.3333		0
66.6667		0
33.3333		100
66.6667		0
33.3333		0
33.3333		0
33.3333		0
66.6667		0

## Sheet: Fig 3E
Control: GR64f-GAL4 > UAS-impTNT								Mutant: GR64f-GAL4 > UAS-TNT
4C	5C	6C	7C	8C	9C	10C		4C	5C	6C	7C	8C	9C	10C
100	100	100	0	0	0	0		0	66.6667	0	0	0	33.3333	33.3333
66.6667	66.6667	66.6667	0	100	33.3333	0		33.3333	33.3333	33.3333	33.3333	0	100	33.3333
33.3333	0	66.6667	66.6667	100	0	0		0	66.6667	0	0	0	0	66.6667
100	0	66.6667	33.3333	0	33.3333	100		0	0	0	0	0	0	66.6667
66.6667	33.3333	0	100	100	66.6667	0		0	0	0	0	0	66.6667	66.6667
33.3333	100	66.6667	100	0	66.6667	33.3333		100	100	66.6667	0	0	66.6667	33.3333
66.6667	66.6667	33.3333	100	0	33.3333	100		100	33.3333	0	33.3333	0	33.3333	0
100	66.6667	66.6667	33.3333	100	66.6667	100		33.3333	100	0	0	0	33.3333	33.3333
0	33.3333	100	0	0	66.6667	66.6667		0	33.3333	66.6667	0	33.3333	100	33.3333
66.6667	0	66.6667	66.6667	0	100	66.6667		66.6667	0	0	0	66.6667	0	33.3333
0	0	66.6667	33.3333	66.6667	33.3333	33.3333		66.6667	100	66.6667	0	33.3333	33.3333	66.6667
33.3333	33.3333	33.3333	66.6667	33.3333	33.3333	0		0	33.3333	0	33.3333	0	0	0
33.3333	0	33.3333	33.3333	0	66.6667	33.3333		33.3333	0	0	0	0	100	33.3333
0	0	33.3333	33.3333	33.3333	33.3333	66.6667		100	66.6667	33.3333	0	0	66.6667	33.3333
33.3333	33.3333	33.3333	66.6667	66.6667	33.3333	66.6667		66.6667	33.3333	33.3333	66.6667	0	66.6667	100
100	100	33.3333	66.6667	100	33.3333	66.6667		33.3333	33.3333	0	33.3333	0	33.3333	0
66.6667	33.3333	66.6667	0	66.6667	66.6667	0		33.3333	33.3333	0	0	100	66.6667	33.3333
66.6667	66.6667	33.3333	66.6667	33.3333	66.6667	0		33.3333	0	33.3333	0	33.3333	66.6667	33.3333
33.3333	66.6667	0	0	33.3333	33.3333	0		33.3333	66.6667	0	0	0	0	0
66.6667	100	33.3333	33.3333	33.3333	33.3333	33.3333		66.6667	66.6667	0	0	0	0	66.6667
66.6667	33.3333	33.3333	33.3333	100	66.6667	100		100	66.6667	66.6667	0	0	33.3333	100
33.3333	33.3333	33.3333	0	66.6667	0	66.6667		100	33.3333	0	33.3333	0	100	0
66.6667	66.6667	0	66.6667	66.6667	0	66.6667		33.3333	66.6667	0	0	0	0	100
33.3333	33.3333	0	66.6667	100	66.6667	66.6667		33.3333	0	33.3333	0	0	0	0
66.6667	33.3333	0	100	66.6667	33.3333	66.6667		0	33.3333	0	100	33.3333	33.3333	66.6667
0	33.3333	66.6667	66.6667	0	100	66.6667		0	0	0	0	0	33.3333	66.6667
33.3333	66.6667	66.6667	100	33.3333	33.3333	0		33.3333	66.6667	0	100	33.3333	33.3333	0
0	66.6667	100	66.6667	33.3333	33.3333	33.3333		0	66.6667	33.3333	0	0	33.3333	66.6667
0	33.3333	66.6667	0	33.3333	0	0		33.3333	66.6667	0	0	0	66.6667	0
33.3333	33.3333	33.3333	0	33.3333	100	33.3333		66.6667	33.3333	0	0	33.3333	66.6667	0

## Sheet:  Fig 3 - S1A
Control: w1118		Mutant:IR76b
66.6667		33.3333
100		100
100		100
0		66.6667
33.3333		0
100		0
66.6667		33.3333
100		0
0		0
0		33.3333
100		100
100		100
100		100
100		33.3333
0		0
0		0
0		66.6667
100		100
66.6667		100
33.3333		66.6667
66.6667		100
66.6667		0
66.6667		100
100		0
66.6667		100
66.6667		0
100		100
33.3333		0
0		100
33.3333		100
0		0
100		33.3333
33.3333		0
33.3333		66.6667
66.6667		33.3333
100		66.6667
100		100
0		0
66.6667		100
66.6667		33.3333

## Sheet:  Fig 3 - S1B
Control: w1118								Mutant: IR76b
4C	5C	6C	7C	8C	9C	10C		4C	5C	6C	7C	8C	9C	10C
66.6667	33.3333	66.6667	33.3333	100	66.6667	66.6667		0	0	0	0	0	0	66.6667
100	66.6667	33.3333	100	0	66.6667	66.6667		100	100	100	33.3333	66.6667	66.6667	33.3333
0	33.3333	66.6667	66.6667	33.3333	33.3333	33.3333		0	0	0	0	0	0	66.6667
100	66.6667	66.6667	66.6667	66.6667	33.3333	66.6667		33.3333	0	0	0	0	0	33.3333
100	100	0	0	33.3333	33.3333	33.3333		0	33.3333	33.3333	0	0	0	33.3333
33.3333	33.3333	66.6667	100	100	33.3333	33.3333		0	0	0	0	0	0	33.3333
100	100	66.6667	33.3333	33.3333	33.3333	100		0	0	0	0	0	0	0
0	0	100	100	33.3333	33.3333	0		0	0	0	0	0	0	0
33.3333	66.6667	66.6667	0	66.6667	66.6667	33.3333		0	0	0	0	0	0	33.3333
0	0	0	100	0	0	0		0	0	0	0	0	33.3333	0
66.6667	100	33.3333	0	100	0	0		0	0	0	0	66.6667	0	33.3333
66.6667	33.3333	100	100	100	66.6667	66.6667		33.3333	100	100	33.3333	66.6667	100	66.6667
0	33.3333	0	0	0	66.6667	100		0	0	0	0	0	0	0
66.6667	33.3333	33.3333	33.3333	66.6667	66.6667	33.3333		0	0	0	33.3333	0	0	0
33.3333	0	0	0	66.6667	0	0		0	66.6667	66.6667	0	0	0	0
66.6667	100	66.6667	33.3333	66.6667	66.6667	0		0	0	0	0	0	0	0
66.6667	33.3333	0	66.6667	0	33.3333	0		33.3333	0	0	33.3333	0	0	33.3333
100	100	33.3333	33.3333	66.6667	66.6667	66.6667		0	0	0	0	0	0	33.3333
33.3333	66.6667	100	100	100	33.3333	33.3333		0	0	0	0	33.3333	0	33.3333
0	0	100	100	66.6667	0	0		0	33.3333	33.3333	0	0	0	0
66.6667	100	33.3333	0	33.3333	100	33.3333		100	66.6667	66.6667	100	100	33.3333	33.3333
0	0	33.3333	33.3333	100	33.3333	0		0	0	0	0	0	0	0
33.3333	66.6667	33.3333	100	66.6667	66.6667	100		0	0	0	0	0	0	0
33.3333	33.3333	100	100	100	100	66.6667		0	0	0	0	0	0	0
66.6667	66.6667	0	0	33.3333	0	33.3333		66.6667	33.3333	33.3333	66.6667	100	0	0
66.6667	33.3333	33.3333	33.3333	100	100	33.3333		0	100	100	0	0	0	0
0	66.6667	66.6667	66.6667	100	66.6667	33.3333		66.6667	33.3333	33.3333	100	33.3333	0	33.3333
66.6667	66.6667	66.6667	33.3333	66.6667	0	66.6667		0	0	0	0	0	0	0
0	33.3333	66.6667	33.3333	33.3333	0	66.6667		0	0	0	0	0	33.3333	0
66.6667	66.6667	66.6667	100	66.6667	100	100		0	0	0	0	0	0	0
66.6667	66.6667	33.3333	0	0	100	100		0	0	0	0	0	0	0
0	33.3333	0	0	100	66.6667	0		0	0	0	0	0	0	0
0	0	66.6667	33.3333	0	0	0		0	0	0	0	0	0	0
66.6667	100	0	100	0	100	100		0	0	0	0	0	0	0
66.6667	33.3333	66.6667	0	0	0	100		0	0	0	0	0	0	0
0	66.6667	33.3333	0	100	100	100		0	0	0	0	0	0	0
0	0	33.3333	100	33.3333	0	0		66.6667	100	100	33.3333	33.3333	100	33.3333
100	100	33.3333	0	0	100	66.6667		0	0	0	0	0	0	0
100	100	66.6667	100	33.3333	100	66.6667		0	0	0	0	0	33.3333	0
66.6667	100	66.6667	66.6667	33.3333	100	33.3333		0	0	0	0	0	0	0
								33.3333	0	0				0
								0	0	0				0
								0	0	0				0
								0	0	0				0
								0	0	0				0
								0	0	0				0
								33.3333	0	0				33.3333
								0	0	0				0
								0	0	0				0
								0	0	0				0

## Sheet:  Fig 3 - S1C
Control: w1118		Mutant:IR25a
100		0
0		33.3333
66.6667		0
100		0
33.3333		33.3333
66.6667		100
66.6667		0
100		100
66.6667		33.3333
0		100
33.3333		33.3333
33.3333		0
0		33.3333
66.6667		0
100		100
66.6667		66.6667
33.3333		33.3333
33.3333
0
0
33.3333		66.6667
0		0
0		100
100		100
100		66.6667
33.3333		33.3333
100		66.6667
0		0
33.3333		0
33.3333		66.6667
100		66.6667
66.6667		0
0		0
100		0
66.6667		100
33.3333		0
100
33.3333
0
100

## Sheet:  Fig 3 - S1D
Control: w1118								Mutant: IR25a
4C	5C	6C	7C	8C	9C	10C		4C	5C	6C	7C	8C	9C	10C
0	66.6667	0	0	0	100	66.6667		0	0	0	0	0	0	0
0	66.6667	0	33.3333	0	0	0		0	66.6667	66.6667	33.3333	0	66.6667	0
100	100	66.6667	100	100	33.3333	0		0	0	0	0	0	33.3333	0
0	0	33.3333	66.6667	100	66.6667	33.3333		0	0	0	0	0	0	0
100	66.6667	66.6667	66.6667	66.6667	66.6667	33.3333		0	0	0	0	0	0	0
33.3333	0	0	0	0	33.3333	100		0	0	66.6667	66.6667	33.3333	33.3333	66.6667
100	100	33.3333	66.6667	100	33.3333	100		0	0	0	0	0	0	0
0	0	0	0	0	33.3333	33.3333		0	33.3333	0	0	0	0	66.6667
0	66.6667	100	100	0	66.6667	100		0	0	0	0	0	0	0
100	100	100	33.3333	100	33.3333	0		100	66.6667	0	33.3333	0	0	0
33.3333	0	100	100	0	100	100		0	33.3333	0	0	0	0	0
33.3333	0	0	33.3333	0	33.3333	0		0	0	0	0	0	0	0
33.3333	33.3333	0	0	66.6667	100	33.3333		0	0	0	33.3333	33.3333	33.3333	0
100	100	0	0	100	33.3333	66.6667		33.3333	0	0	33.3333	0	0	0
66.6667	33.3333	0	33.3333	0	66.6667	66.6667		33.3333	66.6667	33.3333	0	0	0	0
0	0	0	33.3333	0	33.3333	33.3333		66.6667	0	66.6667	33.3333	33.3333	33.3333	33.3333
0	66.6667	100	66.6667	33.3333	66.6667	33.3333		0	0	0	0	66.6667	0	0
0	0	33.3333	33.3333	0	33.3333	33.3333		0	0	33.3333	0	0	0	0
33.3333	66.6667	100	66.6667	33.3333	33.3333	33.3333		0	0	0	0	0	33.3333	0
100	100	100	100	100	33.3333	33.3333		33.3333	33.3333	33.3333	33.3333	33.3333	33.3333	0
66.6667	100	100	66.6667	0	0	66.6667		100	66.6667	0	0	0	33.3333	33.3333
0	0	33.3333	66.6667	100	0	33.3333		33.3333	33.3333	0	0	0	0	33.3333
0	66.6667	0	0	33.3333	0	0		0	0	0	100	66.6667	33.3333	0
0	33.3333	66.6667	100	33.3333	100	100		0	0	0	0	0	0	0
33.3333	0	66.6667	66.6667	100	100	100		0	33.3333	0	0	0	33.3333	0
33.3333	0	66.6667	66.6667	0	33.3333	0		0	0	66.6667	0	0	0	0
33.3333	33.3333	66.6667	0	66.6667	0	0		0	0	66.6667	33.3333	0	0	0
66.6667	0	0	33.3333	0	33.3333	0		0	0	0	0	0	0	0
66.6667	100	0	0	100	33.3333	33.3333		0	0	0	0	0	0	33.3333
100	66.6667	33.3333	66.6667	0	66.6667	33.3333		66.6667	0	0	0	0	0	0
66.6667	33.3333	100	66.6667	100	66.6667	66.6667		0	0	0	0	0	33.3333	0
0	66.6667	0	0	0	66.6667	33.3333		33.3333	0				33.3333	33.3333
0	0	0	0	0	100	66.6667		0	0				0	0
66.6667	66.6667	100	100	0	0	100
33.3333	0	33.3333	33.3333	0	33.3333	0
0	0	0	33.3333	33.3333	0	0
66.6667	66.6667	33.3333	66.6667	100	0	0
0	33.3333	66.6667	33.3333	66.6667	0	0
33.3333	66.6667	66.6667	66.6667	33.3333	100	100
66.6667	100	66.6667	33.3333	0	33.3333	66.6667
