# Supplementary material for: Ir56d-dependent fatty acid responses in Drosophila uncover taste discrimination between different classes of fatty acids
Source: eLife. 2021 May 5;10:e67878. doi: 10.7554/eLife.67878 (PMC8169106; doi:10.7554/eLife.67878)
Supplement: Figure 4—source data 1. [file elife-67878-fig4-data1.xlsx]

## Sheet: Fig 4F
Control: +/+	Heterozygote: IR56dGAL4/+	IR56D Mutant: IR56dGAL4	Rescue: IR56dGAL4 ; UAS-IR56D/+
0	100	100	100
100	66.6667	66.6667	100
33.3333	33.3333	66.6667	0
66.6667	66.6667	0	0
66.6667	66.6667	33.3333	66.6667
0	66.6667	66.6667	0
33.3333	100	100	0
100	33.3333	0	0
66.6667	100	33.3333	0
100	33.3333	0	66.6667
100	0	33.3333	100
100	66.6667	100	0
0	0	0	100
66.6667	100	66.6667	0
66.6667	66.6667	66.6667	33.3333
66.6667	33.3333	33.3333	100
100	66.6667	100	100
100	66.6667	100	33.3333
100	33.3333	66.6667	100
66.6667	0	100	0
0	33.3333	100	33.3333
100	100	66.6667	33.3333
100	33.3333	100	66.6667
100	66.6667	100	33.3333
0	100	100	100
100	100	66.6667	100
66.6667	0	100	66.6667
66.6667	33.3333	100	100
33.3333	100	0	66.6667
66.6667	66.6667	0	66.6667
66.6667	100	66.6667	100
0	66.6667	100	100
100		0	66.6667
			100
			66.6667
			66.6667
			100
			100
			100
			100

## Sheet: Fig 4G
Control: +/+								Heterozygote: IR56dGAL4/+								IR56D Mutant: IR56dGAL4								Rescue: IR56dGAL4 ; UAS-IR56D/+
4C	5C	6C	7C	8C	9C	10C		4C	5C	6C	7C	8C	9C	10C		4C	5C	6C	7C	8C	9C	10C		4C	5C	6C	7C	8C	9C	10C
100	33.3333	0	66.6667	0	0	0		33.3333	0	100	0	33.3333	33.3333	66.6667		33.3333	33.3333	33.3333	0	0	0	0		66.6667	0	33.3333	33.3333	66.6667	0	33.3333
100	33.3333	100	33.3333	0	66.6667	66.6667		0	0	33.3333	33.3333	66.6667	66.6667	0		66.6667	100	0	0	0	0	0		66.6667	66.6667	33.3333	0	66.6667	100	33.3333
33.3333	33.3333	100	66.6667	33.3333	33.3333	0		33.3333	0	100	33.3333	66.6667	33.3333	33.3333		33.3333	100	0	0	0	0	0		66.6667	100	33.3333	66.6667	66.6667	33.3333	66.6667
66.6667	100	66.6667	66.6667	66.6667	0	100		66.6667	66.6667	33.3333	100	100	66.6667	0		66.6667	0	0	0	66.6667	66.6667	66.6667		0	100	66.6667	0	0	66.6667	0
0	100	100	66.6667	33.3333	33.3333	66.6667		0	100	33.3333	66.6667	33.3333	66.6667	0		66.6667	33.3333	0	0	33.3333	0	0		33.3333	33.3333	66.6667	33.3333	33.3333	33.3333	66.6667
100	66.6667	66.6667	66.6667	33.3333	66.6667	0		0	100	33.3333	66.6667	0	0	0		33.3333	66.6667	0	0	66.6667	100	0		33.3333	100	33.3333	0	100	100	0
33.3333	0	100	66.6667	100	33.3333	0		66.6667	0	100	66.6667	33.3333	66.6667	33.3333		33.3333	66.6667	0	0	100	33.3333	66.6667		33.3333	66.6667	33.3333	33.3333	33.3333	0	33.3333
33.3333	33.3333	0	66.6667	33.3333	0	0		66.6667	66.6667	33.3333	66.6667	66.6667	33.3333	66.6667		66.6667	0	0	66.6667	0	0	66.6667		66.6667	66.6667	100	66.6667	66.6667	66.6667	66.6667
33.3333	0	33.3333	100	100	100	66.6667		66.6667	100	100	0	100	100	66.6667		33.3333	66.6667	0	0	0	66.6667	0		66.6667	0	100	33.3333	100	100	66.6667
0	66.6667	33.3333	100	0	66.6667	0		33.3333	0	100	66.6667	0	66.6667	33.3333		66.6667	100	0	33.3333	0	0	0		33.3333	33.3333	66.6667	33.3333	66.6667	33.3333	66.6667
33.3333	66.6667	66.6667	100	0	0	0		100	0	0	66.6667	66.6667	100	33.3333		0	0	0	0	0	33.3333	33.3333		100	33.3333	66.6667	66.6667	0	100	33.3333
33.3333	33.3333	100	0	33.3333	100	0		33.3333	100	100	0	33.3333	33.3333	0		0	66.6667	0	0	0	100	100		0	0	66.6667	66.6667	66.6667	100	0
0	33.3333	33.3333	0	100	66.6667	0		100	0	33.3333	33.3333	66.6667	33.3333	100		33.3333	66.6667	0	0	33.3333	0	33.3333		66.6667	66.6667	33.3333	100	33.3333	66.6667	0
0	33.3333	66.6667	66.6667	33.3333	66.6667	100		0	33.3333	66.6667	100	0	0	33.3333		66.6667	33.3333	0	0	0	66.6667	33.3333		33.3333	0	100	33.3333	33.3333	0	66.6667
100	100	66.6667	0	100	0	66.6667		0	100	100	0	66.6667	66.6667	0		33.3333	66.6667	0	33.3333	0	0	100		0	0	100	33.3333	0	0	33.3333
66.6667	33.3333	66.6667	0	100	66.6667	33.3333		66.6667	0	33.3333	0	0	33.3333	66.6667		33.3333	100	33.3333	0	0	100	0		33.3333	33.3333	33.3333	33.3333	100	100	0
66.6667	100	33.3333	0	0	100	0		33.3333	0	0	0	0	33.3333	33.3333		66.6667	66.6667	0	0	33.3333	0	33.3333		66.6667	100	100	33.3333	0	0	0
100	100	100	100	0	100	0		0	0	100	100	100	0	0		33.3333	33.3333	0	33.3333	33.3333	0	33.3333		100	100	66.6667	100	100	33.3333	33.3333
100	100	33.3333	100	0	33.3333	100		66.6667	100	0	100	33.3333	100	0		0	0	0	0	0	100	0		66.6667	66.6667	33.3333	100	33.3333	33.3333	66.6667
0	33.3333	33.3333	100	33.3333	33.3333	100		33.3333	100	0	0	33.3333	100	33.3333		100	33.3333	0	0	0	66.6667	66.6667		0	100	0	33.3333	0	0	100
66.6667	0	0	33.3333	33.3333	100	0		100	100	33.3333	33.3333		33.3333	100		66.6667	100	33.3333	0	0	33.3333	33.3333		0	33.3333		0		33.3333	100
66.6667	33.3333	100	0	100	33.3333	66.6667		0	100	100	66.6667		0	66.6667		0	33.3333	0	0	0	100	33.3333		33.3333	100		33.3333		33.3333	33.3333
100	100	100	0	0	66.6667	66.6667		66.6667	100	0	66.6667		66.6667	33.3333		33.3333	100	0	0	0	66.6667	66.6667		100	0		100		0	66.6667
0	66.6667	100	66.6667	0	0	33.3333		100	33.3333	33.3333	33.3333		0	0		66.6667	100	0	0	33.3333	0	0		33.3333	100		33.3333		100	0
100	100	0	33.3333	66.6667	100	66.6667		0	100	100	66.6667		66.6667	33.3333		100	66.6667	0	0	0	66.6667	0		33.3333	0		100		66.6667	33.3333
100	100	66.6667	0	66.6667	0	33.3333		0	33.3333	100	100		33.3333	100		66.6667	33.3333	0	33.3333	0	0			66.6667	33.3333		66.6667		0	33.3333
100	100	0	66.6667	66.6667	0	66.6667		0	100	0	100		0	0		66.6667	0	33.3333	0	0	0			100	0		33.3333		0	66.6667
33.3333	100	0	0	33.3333	33.3333	66.6667		0	100	66.6667	0		0	66.6667		100	33.3333	0	0	0	66.6667			100	66.6667		66.6667		66.6667	100
0		66.6667	66.6667	33.3333	0	0		100	100	100	66.6667		0	0			100	0	0	0	66.6667			66.6667	66.6667		100		0	0
33.3333		0	100	66.6667	0	0		100	100	0	0		33.3333	0			33.3333	0	0	0	100			66.6667	100		100		66.6667	33.3333
		100	0	33.3333	100			66.6667		100				0			100	33.3333		0	33.3333				100
		66.6667	0	100	33.3333			100		33.3333				0			100	0		0	100				100
		66.6667	0	66.6667	66.6667			100						100				0		0					100
			0	66.6667	0			33.3333						66.6667						33.3333					100
			0	66.6667	0			100						33.3333						0					33.3333
			0	100	100			100						33.3333						0					100
			100	100				66.6667						66.6667						0					100
			100	33.3333				100						33.3333						0					100
			0					33.3333						100						0					66.6667
			100					100						66.6667						0					66.6667
																									0

## Sheet: Fig 4 - S1
Control: +/+			Heterozygote: IR56dGAL4/+			IR56D Mutant: IR56dGAL4			Rescue: IR56dGAL4 ; UAS-IR56D/+
Sucrose	6C		Sucrose	6C		Sucrose	6C		Sucrose	6C
0	33.3333		66.6667	33.3333		0	0		66.6667	33.3333
0	0		33.3333	100		0	0		0	33.3333
33.3333	33.3333		66.6667	33.3333		33.3333	0		33.3333	0
33.3333	33.3333		33.3333	0		33.3333	0		33.3333	33.3333
33.3333	0		0	0		33.3333	0		0	0
33.3333	66.6667		0	0		100	0		33.3333	33.3333
66.6667	66.6667		0	0		0	0		0	0
0	66.6667		100	66.6667		0	0		33.3333	33.3333
66.6667	66.6667		0	66.6667		66.6667	0		0	0
33.3333	33.3333		33.3333	66.6667		33.3333	0		66.6667	66.6667
100	100		100	33.3333		66.6667	0		0	0
0	100		66.6667	100		0	0		0	0
100	33.3333		0	33.3333		0	0		0	0
66.6667	33.3333		100	66.6667		66.6667	0		33.3333	33.3333
100	0		66.6667	0		33.3333	0		0	0
0	0		0	33.3333		33.3333	0		33.3333	33.3333
66.6667	66.6667		0	33.3333		0	0		66.6667	66.6667
100	33.3333		0	0		0	0		33.3333	33.3333
33.3333	66.6667		33.3333	66.6667		100	0		33.3333	33.3333
66.6667	66.6667		0	66.6667		66.6667	0		66.6667	66.6667
100	100		66.6667	66.6667		66.6667	0		33.3333	33.3333
100	100		0	33.3333		66.6667	0		33.3333	33.3333
0	33.3333		33.3333	0		33.3333	0		33.3333	33.3333
0	0		33.3333	33.3333		33.3333	0		33.3333	33.3333
100	0		33.3333	66.6667		33.3333	33.3333		66.6667	66.6667
33.3333	33.3333		33.3333	33.3333		33.3333	0		33.3333	33.3333
0	66.6667		66.6667	0		33.3333	0		66.6667	66.6667
0	66.6667		33.3333	66.6667		100	0		33.3333	33.3333
0	0		66.6667	33.3333		33.3333	0		100	100
100	100		100	33.3333		66.6667	0		100	100
33.3333	66.6667		0	0		100	0		100	100
0	66.6667		0	0		0	0		33.3333	33.3333
33.3333	0		33.3333	0		0	0		66.6667	66.6667
33.3333	66.6667		33.3333	66.6667		33.3333	0		0	0
0	0		33.3333	33.3333		66.6667	0		33.3333	33.3333
66.6667	66.6667		100	100		100	66.6667		0	0
0	0		33.3333	100		0	0		33.3333	33.3333
			0	0		33.3333	0
			33.3333	0		0	0
			33.3333	33.3333		0	0
