# Supplementary material for: Ir56d-dependent fatty acid responses in Drosophila uncover taste discrimination between different classes of fatty acids
Source: eLife. 2021 May 5;10:e67878. doi: 10.7554/eLife.67878 (PMC8169106; doi:10.7554/eLife.67878)
Supplement: Figure 5—source data 1. [file elife-67878-fig5-data1.xlsx]

## Sheet: Fig 5H
Control: IR56dGAL4 /+ ; UAS-GCamp6/+										IR56D Mutant: IR56dGAL4 ; UAS-GCamp6/+										Rescue: IR56dGAL4 , UAS-IR56D/UAS-GCamp6
Water	Sucrose	4C	5C	6C	7C	8C	9C	10C		Water	Sucrose	4C	5C	6C	7C	8C	9C	10C		Water	Sucrose	4C	5C	6C	7C	8C	9C	10C
8.14683	16.1164	28.5416	15.7555	42.3637	22.987	30.7701	25.8306	32.9147		10.2645	38.1111	35.111	45.027	2.00067	11.722	10.7416	22.0556	30.1995		6.78453	25.4154	33.8381	28.9112	36.6007	32.5934	17.9639	16.5571	33.2024
10.7132	37.4161	25.255	15.1162	29.9862	36.6136	21.2121	27.702	31.3026		4.56817	22.3503	33.8311	43.2552	4.99993	9.51306	5.2313	23.0286	19.6282		3.41909	39.9128	25.6769	36.3165	40.0869	15.6843	18.9527	12.9352	29.4924
2.58489	34.8276	19.4702	37.9101	48.2779	25.7707	32.7009	28.4633	22.2163		3.45655	18.1583	14.9277	39.1652	7.9324	13.2981	5.01539	43.2177	19.3881		8.63039	34.9349	28.1688	34.4958	29.5746	19.7421	22.3507	33.903	22.1469
12.296	32.2421	51.0406	37.2255	45.0529	46.5961	26.187	19.1651	33.6013		8.67326	20.5756	43.417	21.5198	7.56122	9.35487	11.0489	30.208	20.8075		6.05644	45.3364	18.3539	27.4871	30.7359	35.5462	34.6918	28.2481	24.3723
3.95258	16.9097	24.7023	42.6291	28.1102	26.661	32.8434	43.8431	30.4191		3.914	48.9145	25.9416	31.5707	4.52553	7.77905	9.40328	30.06	29.4023		3.51725	34.9031	24.5367	26.3028	35.8434	45.8121	38.7003	28.0656	27.3359
4.39908	52.7906	29.7709	28.2759	19.5426	32.5153	34.4973	36.6758	31.0111		10.0288	37.0458	57.8262	40.6667	7.36207	10.4202	11.2439	21.3334	34.4368		9.36656	34.8774	42.2462	33.5826	34.9592	54.5528	40.2768	26.2542	27.3886
2.52767	37.3609	20.8923	26.9668	23.7096	37.2003	19.5575	30.8346	18.2742		6.44622	20.6468	37.6832	38.8585	6.23456	8.07408	12.4912	26.5289	37.6399		9.11651	18.0288	41.4992	22.9706	31.6744	34.8356	34.9263	32.7148	23.5722
3.64271	20.566	31.0724	29.0507	20.8017	16.6836	21.6899	22.3653	33.0403		9.99108	26.9525	19.4302	38.3602	4.59251	5.33563	3.18528	39.3823	46.8131		11.1105	31.2087	43.4078	24.9559	39.4001	28.2325	29.7325	37.5182	22.0136
5.54587	29.168	40.9023	43.0016	33.7404	30.0998		30.4299	34.4762		8.02976	28.0607	18.4395	22.3904	10.2705	8.00008	10.5354	40.8399	29.032		10.2942	22.5795	35.5825	37.1677	24.7491	26.2177		25.3075	27.4921
11.8107	32.3439		45.5524	28.0636	38.3671		23.0917			3.97702	37.1406	23.5452	23.3552	2.35752	4.35355	9.31428	34.7503	22.8089		6.22033	18.2608		26.1206		29.2178		27.7158	21.8003
7.43371	21.1666		45.3844		34.0645					4.67434		34.1945	20.1339					44.2375			28.0045				34.2386
2.7229			12.8008		16.3447							25.567	18.1098					27.9701			21.4508
5.79389												31.7668
12.5784												43.3504
