# Supplementary material for: Ir56d-dependent fatty acid responses in Drosophila uncover taste discrimination between different classes of fatty acids
Source: eLife. 2021 May 5;10:e67878. doi: 10.7554/eLife.67878 (PMC8169106; doi:10.7554/eLife.67878)
Supplement: Figure 6—source data 1. [file elife-67878-fig6-data1.xlsx]

## Sheet: Fig 5H
IR56dGAL4/Gr64f-LexA ; UAS-GCamp6/ LexAop-GAL80
Water	Sucrose	4C	5C	6C	7C	8C	9C	10C
6.2597	17.3685	37.8144	25.9818	63.7613	55.0001	45.0312	49.859	84.3358
11.0408	16.2367	34.3548	33.4287	63.8316	72.2001	58.2448	74.7358	80.8004
7.95366	13.6688	38.0808	36.333	68.7767	65.9938	61.3107	55.5417	73.9537
5.92704	4.30651	38.8375	37.0429	99.2904	69.4403	69.841	85.8513	70.5574
10.4402	21.0358	30.9427	29.6351	59.9496	86.8301	78.0247	73.1714	36.5251
8.06253	4.01852	34.6657	40.8189	57.8896	52.954	69.5797	81.8323	60.5546
18.6185	15.2944	35.3948	40.2121	67.719	57.1802	64.0153	66.8169	66.4624
16.0434		37.2943	31.3692	64.7112	81.4256	68.7668	49.9046
		33.5461	21.1837	66.8536	68.1377	42.3879	78.7163
		34.7587		69.5622			64.2267
		44.0014		76.6079			57.8295
		41.5337		44.1733			51.7287
