# Supplementary material for: Ir56d-dependent fatty acid responses in Drosophila uncover taste discrimination between different classes of fatty acids
Source: eLife journal article supplement (doi:10.7554/elife.67878), 2021-05-05
Supplement: supp [file elife_poa_e67878_Figure_1_figure_supplement_2.pdf › elife_poa_e67878_Figure_1_figure_supplement_2.pdf]

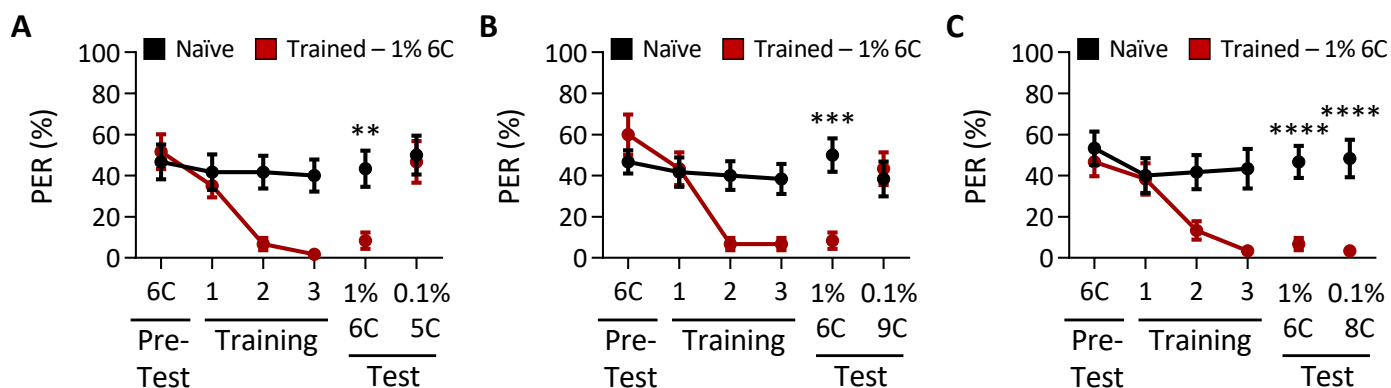

**Figure 1 – Figure Supplement 2.** Tastant intensity does not affect the ability of *Drosophila* to discriminate between short-, medium-, and long-chain fatty acids. Aversive taste memory was measured as described in Figure 1A. **A** The pairing of medium-chain hexanoic acid (6C) and quinine (red) results in a significant reduction in PER compared to naïve flies. After training, PER response to 1% 6C was significantly lower in trained flies compared to naïve flies ( $P=0.0090$ ), but there was no difference in PER to 0.1% short-chain valeric acid (5C;  $P=0.9521$ ). REML:  $F_{1,38} = 4.128$ ,  $P=0.0492$ , with Sidak's Test for multiple comparisons;  $N=20$ . **B** The pairing of medium-chain hexanoic acid (6C) and quinine (red) results in a significant reduction in PER compared to naïve flies. After training, PER response to 1% 6C was significantly lower in trained flies compared to naïve flies ( $P=0.0003$ ), but there was no difference in PER to long-chain nonanoic acid (9C;  $P=0.8671$ ). REML:  $F_{1,38} = 6.090$ ,  $P=0.0158$ , with Sidak's Test for multiple comparisons;  $N=20$ . **C** The pairing of medium-chain hexanoic acid (6C) and quinine (red) results in a significant reduction in PER compared to naïve flies. After training, PER to both 1% 6C and 0.1% medium-chain octanoic acid (8C) was significantly lower in trained flies compared to naïve flies (6C:  $P<0.0001$ ; 8C:  $P<0.0001$ ). REML:  $F_{1,38} = 35.94$ ,  $P<0.0001$ , with Sidak's Test for multiple comparisons;  $N=20$ . Error bars indicate  $\pm$ SEM. \*\*  $P<0.01$ ; \*\*\*  $P<0.001$ ; \*\*\*\*  $P<0.0001$ .
