# Supplementary material for: Ir56d-dependent fatty acid responses in Drosophila uncover taste discrimination between different classes of fatty acids
Source: eLife journal article supplement (doi:10.7554/elife.67878), 2021-05-05
Supplement: supp [file elife_poa_e67878_Figure_1_figure_supplement_3.pdf › elife_poa_e67878_Figure_1_figure_supplement_3.pdf]

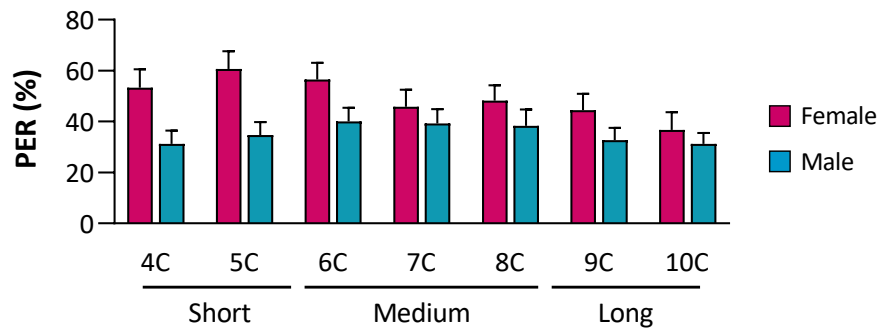

**Carbon Chain Length**  
**Figure 1 – Figure Supplement 3.** *Drosophila* of both sexes are responsive to short-, medium-, and long-chain fatty acids. N=28-40.
