# Supplementary material for: Ir56d-dependent fatty acid responses in Drosophila uncover taste discrimination between different classes of fatty acids
Source: eLife journal article supplement (doi:10.7554/elife.67878), 2021-05-05
Supplement: supp [file elife_poa_e67878_Figure_1_figure_supplement_4.pdf › elife_poa_e67878_Figure_1_figure_supplement_4.pdf]

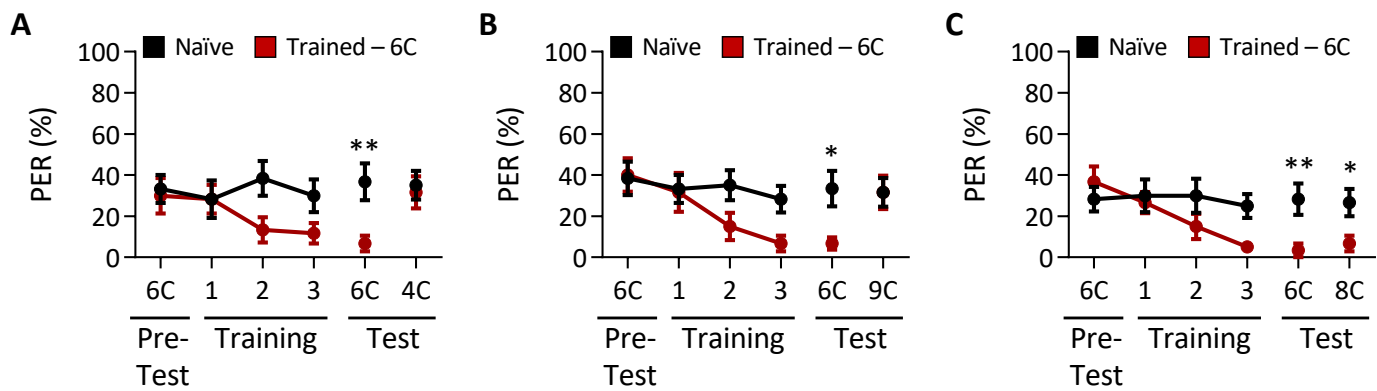

**Figure 1 – Figure Supplement 4.** *Drosophila* males can discriminate between short-, medium-, and long-chain fatty acids, but not among medium-chain fatty acids. Aversive taste memory was measured as described in Figure 1A, but in  $w^{1118}$  males. **A** The pairing of medium-chain hexanoic acid (6C) and quinine (red) results in a significant reduction in PER compared to naïve flies. After training, PER response to 6C was significantly lower in trained flies compared to naïve flies ( $P=0.0085$ ), but there was no difference in PER to short-chain butyric acid (4C;  $P=0.9346$ ). REML:  $F_{1,38} = 5.208$ ,  $P=0.0282$ , with Sidak's Test for multiple comparisons;  $N=20$ . **B** The pairing of medium-chain hexanoic acid (6C) and quinine (red) results in a significant reduction in PER compared to naïve flies. After training, PER response to 6C was significantly lower in trained flies compared to naïve flies ( $P=0.0193$ ), but there was no difference in PER to long-chain nonanoic acid (9C;  $P=0.9999$ ). REML:  $F_{1,38} = 4.143$ ,  $P=0.0488$ , with Sidak's Test for multiple comparisons;  $N=20$ . **C** The pairing of medium-chain hexanoic acid (6C) and quinine (red) results in a significant reduction in PER compared to naïve flies. After training, PER to both 6C and medium-chain octanoic acid (8C) was significantly lower in trained flies compared to naïve flies (6C:  $P=0.0056$ ; 8C:  $P=0.0310$ ). REML:  $F_{1,38} = 11.49$ ,  $P=0.0017$ , with Sidak's Test for multiple comparisons;  $N=20$ . Error bars indicate  $\pm$ SEM. \* $P<0.05$ ; \*\* $P<0.01$ .
