# Supplementary material for: Ir56d-dependent fatty acid responses in Drosophila uncover taste discrimination between different classes of fatty acids
Source: eLife journal article supplement (doi:10.7554/elife.67878), 2021-05-05
Supplement: supp [file elife_poa_e67878_Figure_4_figure_supplement_1.pdf › elife_poa_e67878_Figure_4_figure_supplement_1.pdf]

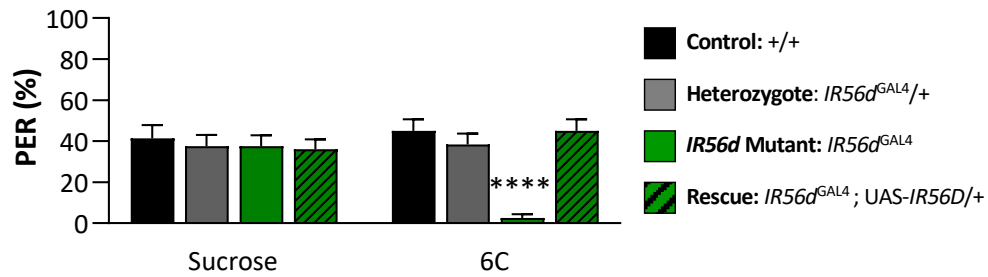

**Figure 4 – Figure Supplement 1.** *IR56d* mediates taste perception to medium-chain hexanoic acid (6C) in male flies. Although sucrose taste perception is similar in control and *IR56d*<sup>GAL4</sup> mutant flies, *IR56d*<sup>GAL4</sup> flies have reduced PER to medium-chain hexanoic acid (6C) relative to control, *IR56d*<sup>GAL4</sup> heterozygotes, and *IR56d*<sup>GAL4</sup> rescue flies. REML:  $F_{3,150} = 5.394$ ,  $P = 0.0015$ , with Sidak's Test for multiple comparisons; N=37-40. Error bars indicate  $\pm$ SEM. \*\*\*\* $P < 0.0001$ .
