# Supplementary material for: Ir56d-dependent fatty acid responses in Drosophila uncover taste discrimination between different classes of fatty acids
Source: eLife journal article supplement (doi:10.7554/elife.67878), 2021-05-05
Supplement: supp [file elife_poa_e67878_Figure_5_figure_supplement_1.pdf › elife_poa_e67878_Figure_5_figure_supplement_1.pdf]

**A Control:** *IR56d<sup>GAL4</sup>/+ ; UAS-GCamp6/+*

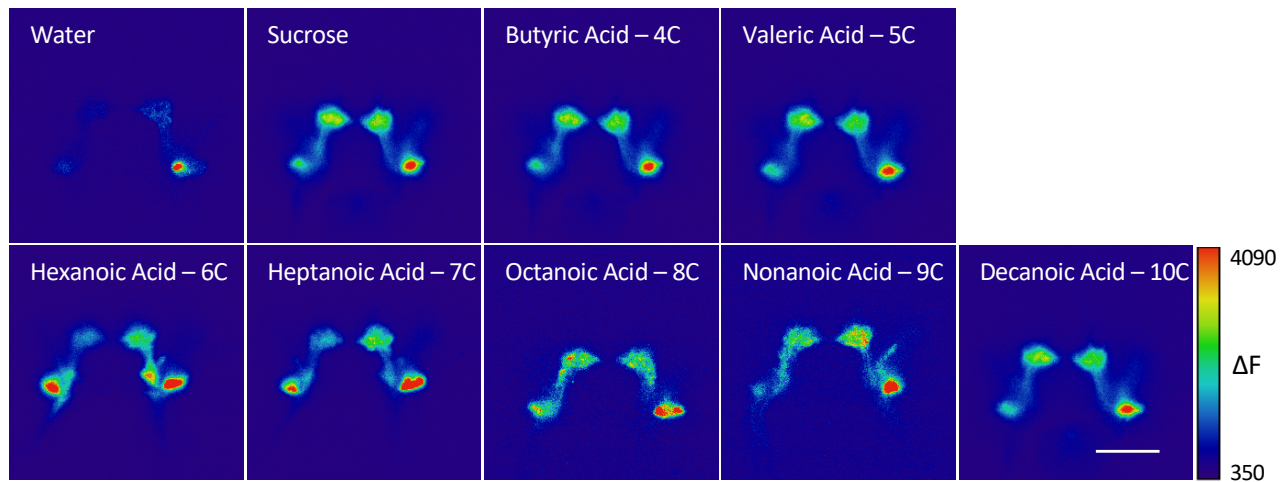

**B IR56DCRISPR:** *IR56d<sup>GAL4</sup> ; UAS-GCamp6/+*

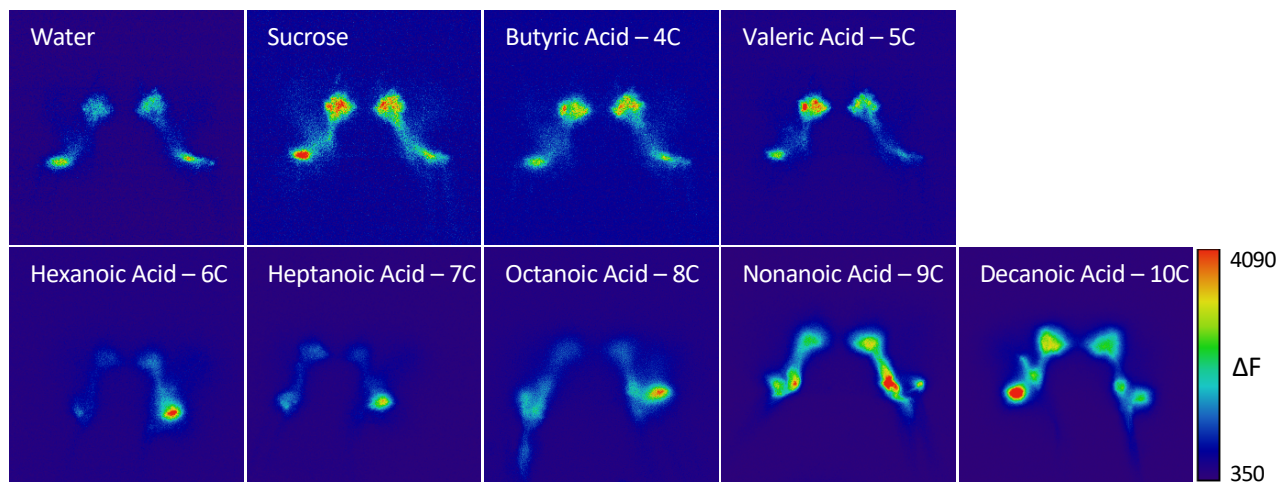

**C Rescue:** *IR56d<sup>GAL4</sup> ; UAS-GCamp6/UAS-IR56D*

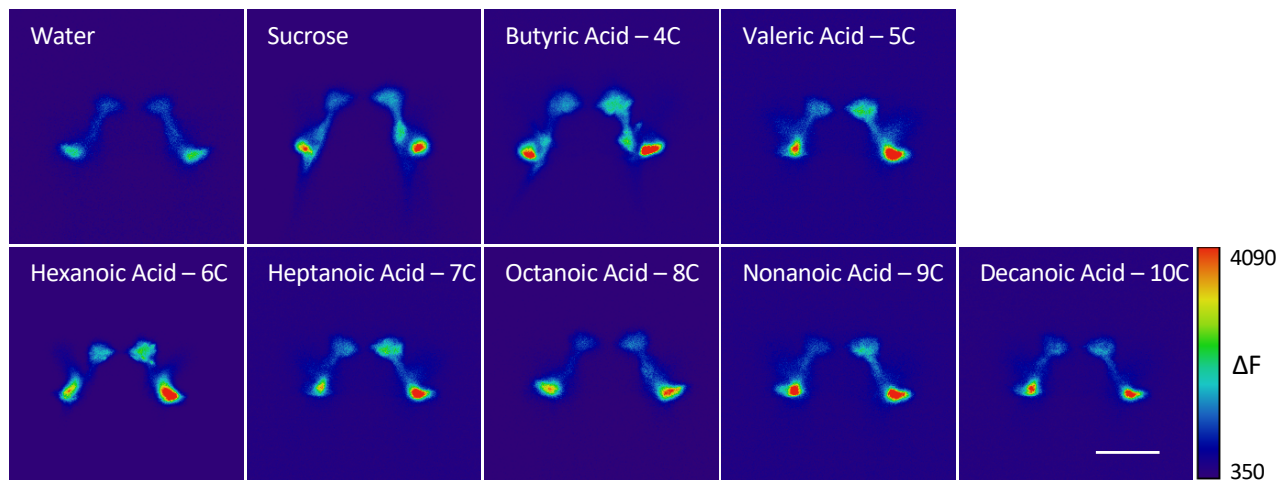

**Figure 5 – Figure Supplement 1.** Representative pseudocolor images of calcium activity in the posterior projections of *IR56d* neurons in response to fatty acid presentation. The change in UAS-GCamp6 fluorescence ( $\Delta F$ ) is shown for (A) *IR56d<sup>GAL4</sup>* heterozygote controls, (B) *IR56d<sup>GAL4</sup>* mutants, and (C) *IR56d<sup>GAL4</sup>* rescue flies. Error bars indicate  $\pm$ SEM. \*\*\*\* $P < 0.0001$ .
